# Supplementary material for: Comparative Phytoprofiling of Achillea millefolium Morphotypes: Assessing Antioxidant Activity, Phenolic and Triterpenic Compounds Variation across Different Plant Parts
Source: MDPI journal article supplement (doi:10.3390/plants13071043), 2024-04-08
Supplement: s1 [file s1]

**Table S1.** HPLC-PDA methods phenolic and triterpenic compounds identification and quantification parameters.

| Compound                             | Calibration curve     | Coefficient of determination ( $r^2$ ) | LOD ( $\mu\text{g/mL}$ ) | LOQ ( $\mu\text{g/mL}$ ) |
|--------------------------------------|-----------------------|----------------------------------------|--------------------------|--------------------------|
| Neochlorogenic acid                  | $y = 44600x - 47800$  | 0.99981                                | 0.37                     | 1.13                     |
| Chlorogenic acid                     | $y = 47700x + 2650$   | 0.99992                                | 0.13                     | 0.41                     |
| 4- <i>O</i> -caffeoylquinic acid     | $y = 60200x - 16200$  | 0.99996                                | 0.08                     | 0.23                     |
| 3,4- <i>O</i> -dicaffeoylquinic acid | $y = 56700x - 6790$   | 0.99999                                | 0.03                     | 0.09                     |
| 3,5- <i>O</i> -dicaffeoylquinic acid | $y = 79100x - 36900$  | 0.99990                                | 0.09                     | 0.28                     |
| 1,5- <i>O</i> -dicaffeoylquinic acid | $y = 70500x - 23900$  | 0.99937                                | 0.65                     | 1.57                     |
| 4,5- <i>O</i> -dicaffeoylquinic acid | $y = 40400x - 9600$   | 0.99998                                | 0.05                     | 0.15                     |
| Cynarin                              | $y = 58900x + 21100$  | 0.99996                                | 0.35                     | 0.92                     |
| Caffeic acid                         | $y = 100000x + 3500$  | 0.99999                                | 0.28                     | 0.86                     |
| Quercitrin                           | $y = 30500x + 1380$   | 0.99999                                | 0.08                     | 0.23                     |
| Rutin                                | $y = 29000x + 1370$   | 0.99998                                | 0.11                     | 0.32                     |
| Hesperidin                           | $y = 408000x + 15900$ | 0.99996                                | 0.13                     | 0.35                     |
| Quercetin                            | $y = 61900x - 10000$  | 0.99999                                | 0.04                     | 0.13                     |
| Isoquercitrin                        | $y = 38400x + 74800$  | 0.99984                                | 0.06                     | 0.19                     |
| Nicotiflorin                         | $y = 35800x + 21100$  | 0.99996                                | 0.22                     | 0.71                     |
| Luteolin                             | $y = 25200x - 26000$  | 0.99931                                | 0.48                     | 1.44                     |
| Luteolin-7- <i>O</i> -glucoside      | $y = 54300x + 1040$   | 0.99998                                | 0.05                     | 0.15                     |
| Luteolin-7- <i>O</i> -rutinoside     | $y = 40300x - 3980$   | 0.99999                                | 0.03                     | 0.08                     |
| Luteolin-3,7- <i>O</i> -diglucoside  | $y = 31200x + 19100$  | 0.99929                                | 0.31                     | 0.94                     |
| Luteolin-7- <i>O</i> -glucuronide    | $y = 49300x + 20600$  | 0.99944                                | 0.25                     | 0.73                     |
| Apigenin                             | $y = 90100x + 9770$   | 0.99997                                | 0.03                     | 0.10                     |
| Apigenin-7- <i>O</i> -glucoside      | $y = 68600x - 3820$   | 0.99992                                | 0.06                     | 0.17                     |
| Santin                               | $y = 64700x - 132000$ | 0.99975                                | 0.47                     | 1.41                     |
| Maslinic acid                        | $y = 8960x + 2060$    | 0.99995                                | 0.08                     | 0.24                     |
| Corosolic acid                       | $y = 6910x + 1270$    | 0.99991                                | 0.16                     | 0.48                     |
| Betulinic acid                       | $y = 8970x + 4310$    | 0.99996                                | 0.11                     | 0.32                     |
| Oleanolic acid                       | $y = 12600x + 8710$   | 0.99994                                | 0.21                     | 0.65                     |
| Ursolic acid                         | $y = 9040x + 30900$   | 0.99998                                | 0.26                     | 0.82                     |
| Betulin                              | $y = 10600x + 4350$   | 0.99999                                | 0.29                     | 0.89                     |
| Uvaol                                | $y = 9310x + 4390$    | 0.99993                                | 0.30                     | 0.99                     |
| Betulinic acid methyl ester          | $y = 5940x - 3590$    | 0.99941                                | 0.19                     | 0.61                     |
| $\beta$ -Amyrin                      | $y = 7870x + 4310$    | 0.99999                                | 0.14                     | 0.43                     |
| $\beta$ -Sitosterol                  | $y = 3980x + 3610$    | 0.99992                                | 0.37                     | 1.13                     |
| $\alpha$ -Amyrin                     | $y = 6470x + 9440$    | 0.99999                                | 0.24                     | 0.73                     |
